# Supplementary figures and images for: MicroRNAs mediate precise control of spinal interneuron populations to exert delicate sensory-to-motor outputs
Source: eLife journal article supplement (doi:10.7554/elife.63768), 2021-03-31

Figure 1—figure supplement 1

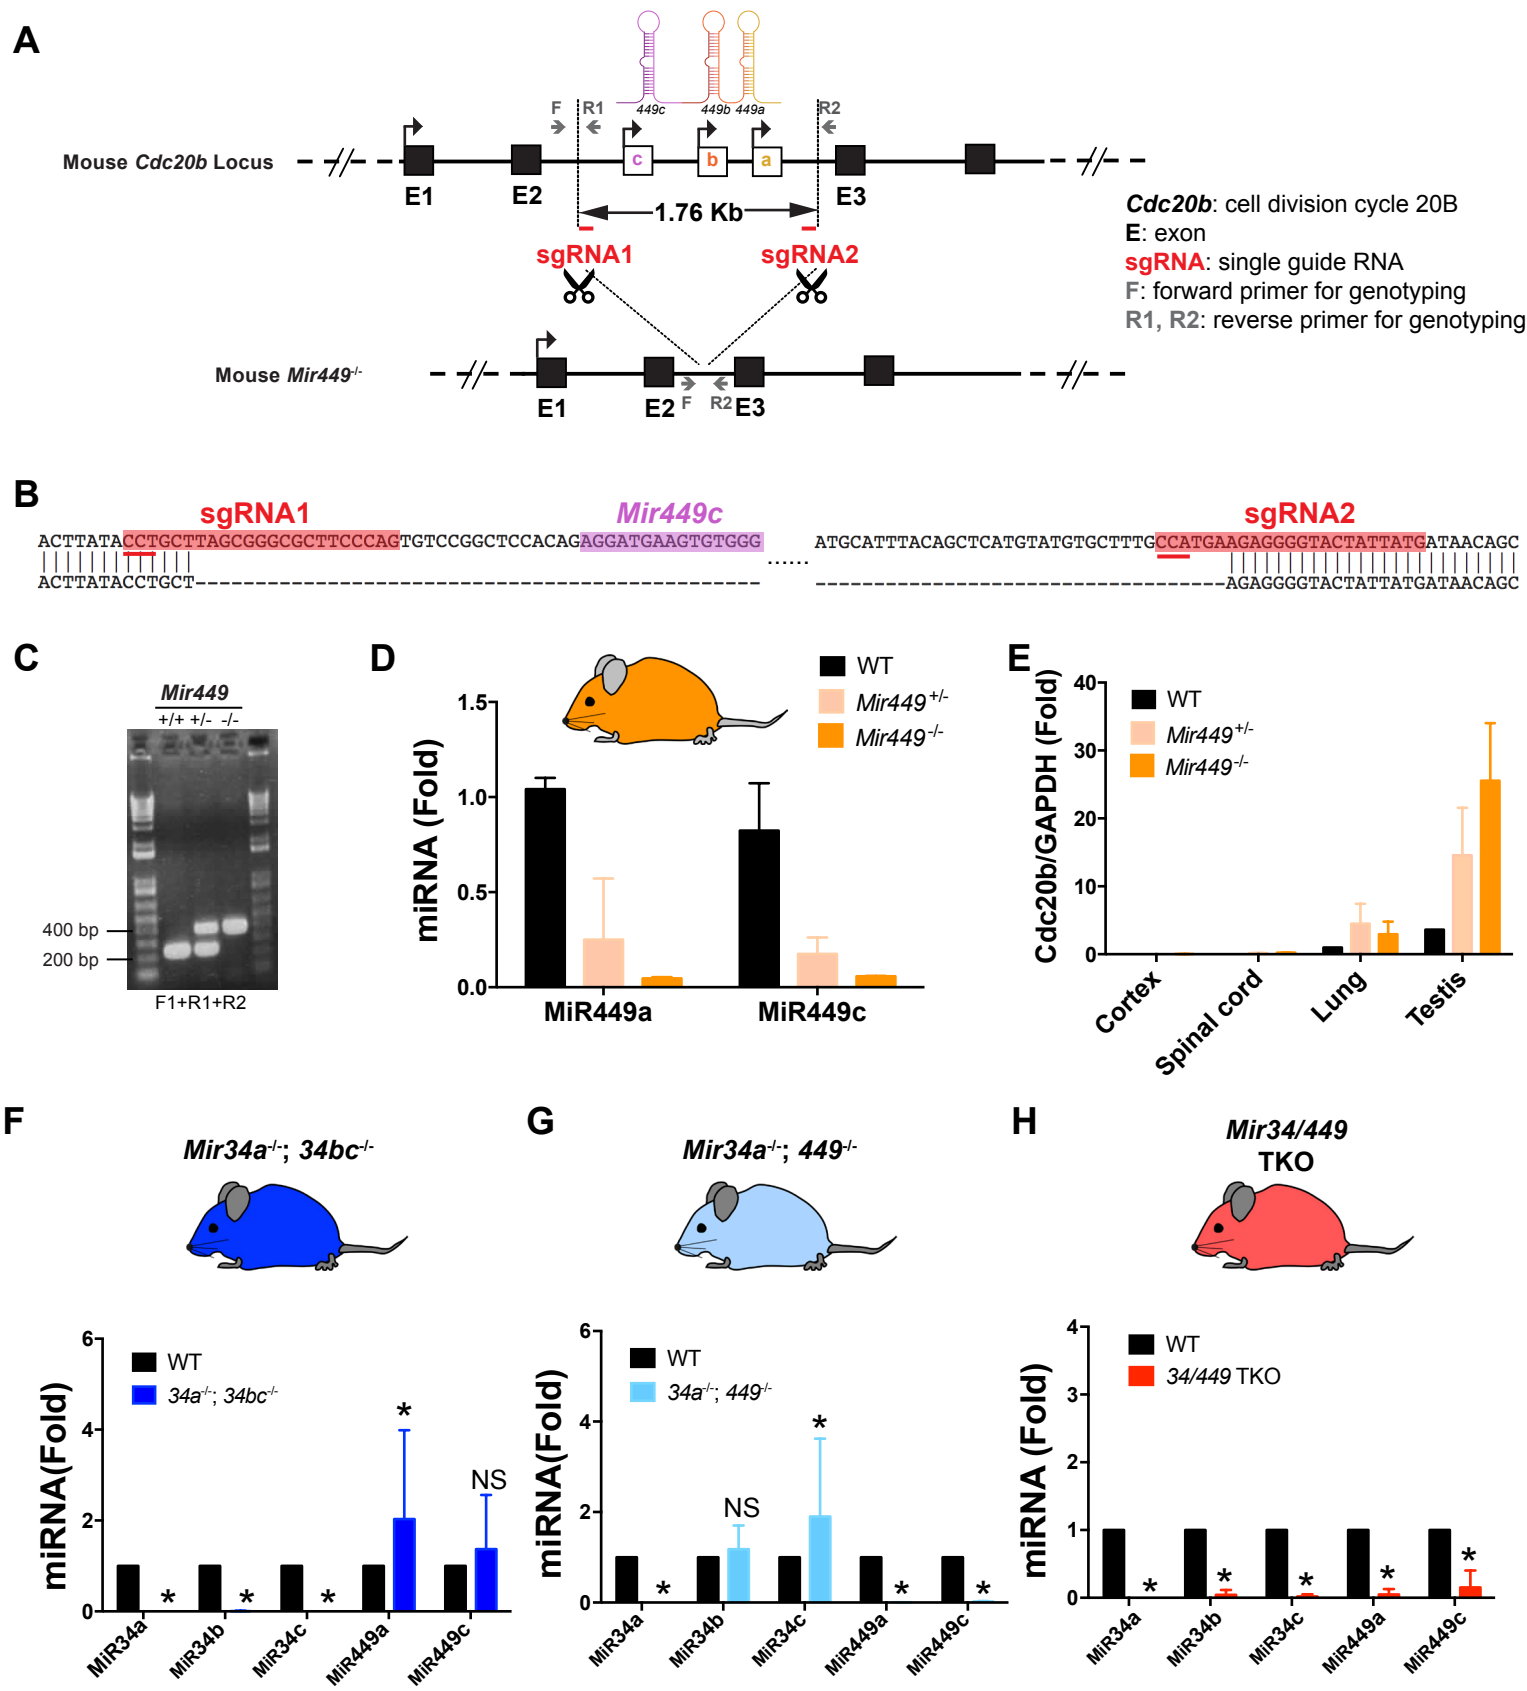

Supplement: supp [file elife_poa_e63768_Figure_1_figure_supplement_1.pdf › elife_poa_e63768_Figure_1_figure_supplement_1.pdf]

Figure 2—figure supplement 1

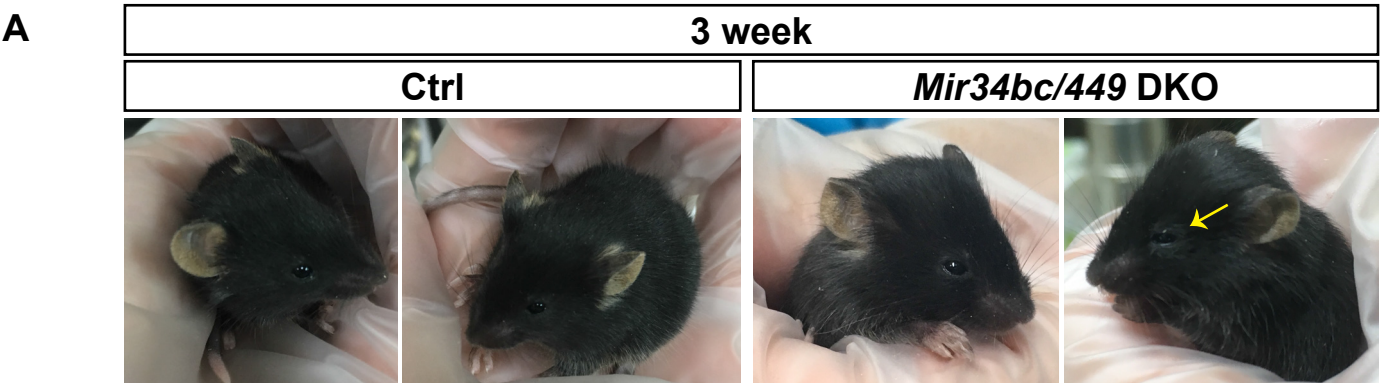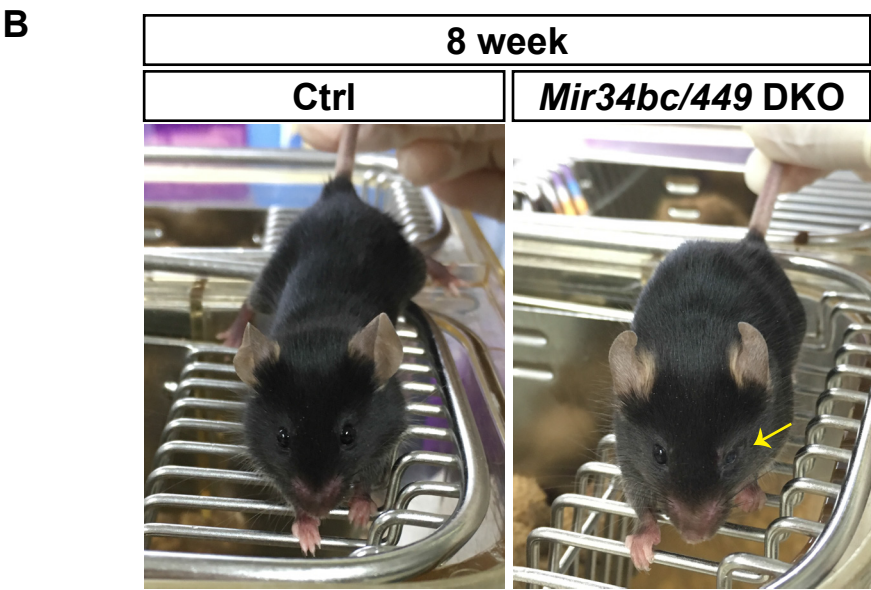

Supplement: supp [file elife_poa_e63768_Figure_2_figure_supplement_1.pdf › elife_poa_e63768_Figure_2_figure_supplement_1.pdf]

Figure 3—figure supplement 1

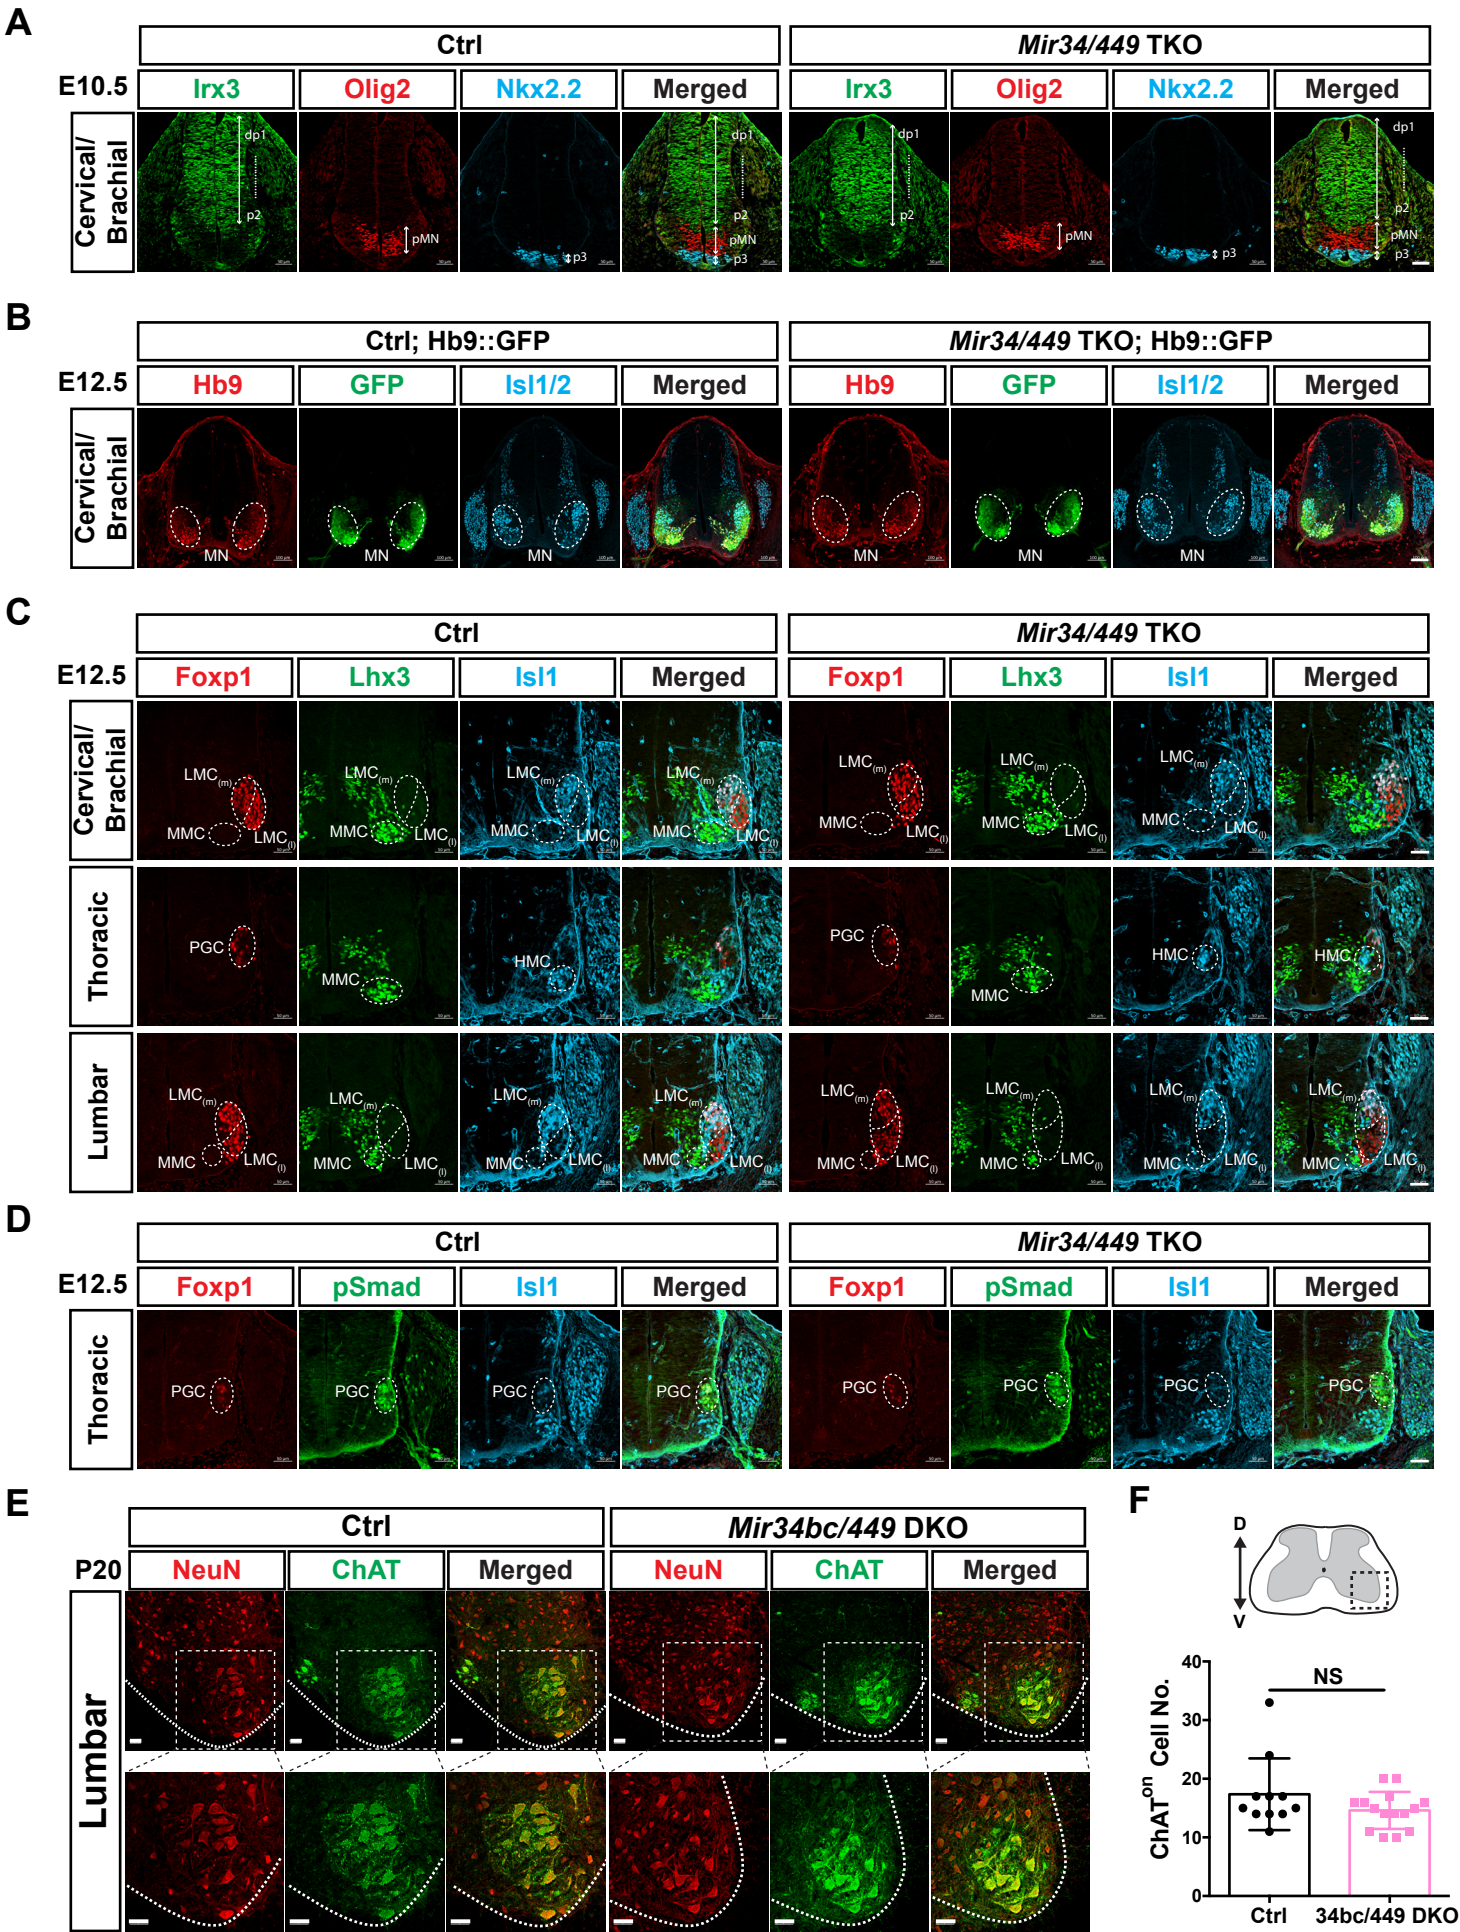

Supplement: supp [file elife_poa_e63768_Figure_3_figure_supplement_1.pdf › elife_poa_e63768_Figure_3_figure_supplement_1.pdf]

Figure 3—figure supplement 2

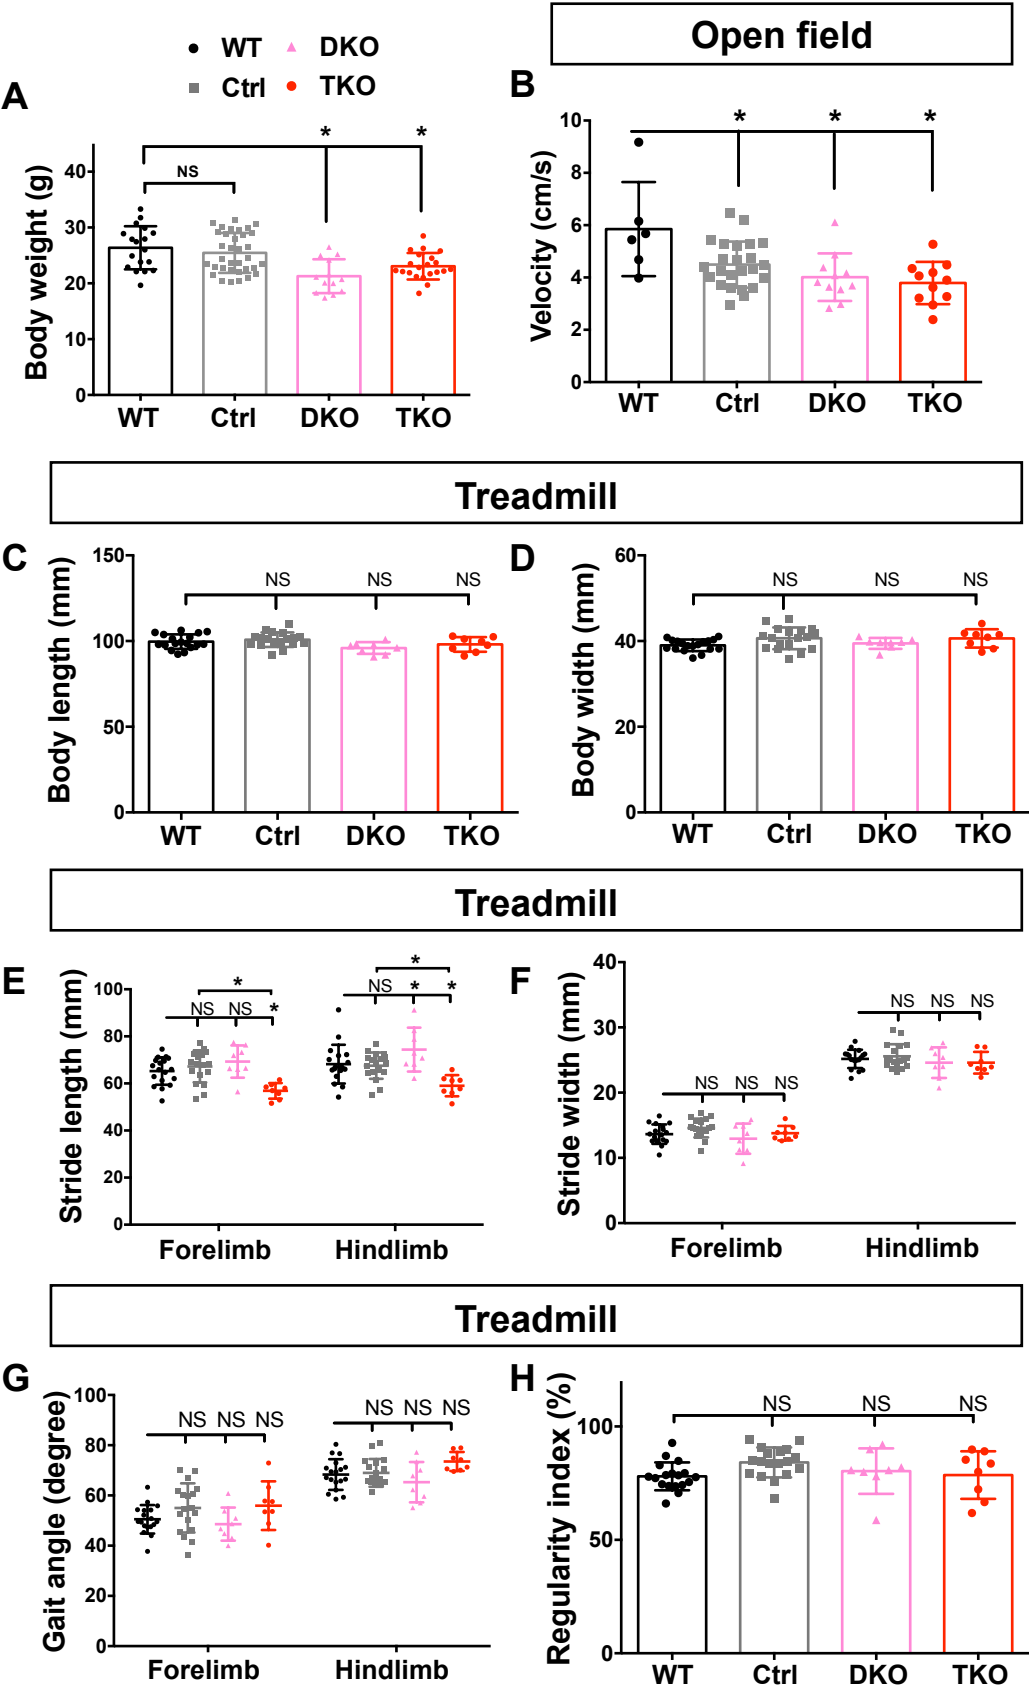

Supplement: supp [file elife_poa_e63768_Figure_3_figure_supplement_2.pdf › elife_poa_e63768_Figure_3_figure_supplement_2.pdf]

Figure 5—figure supplement 1

A

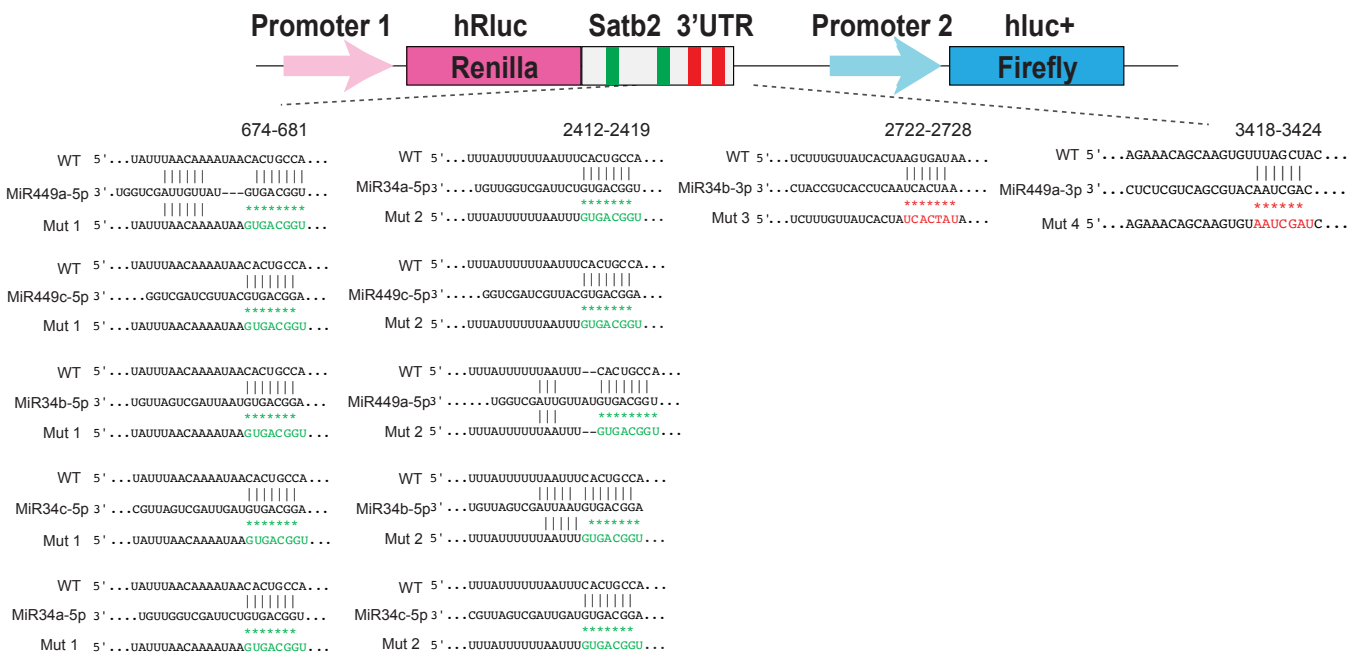

B

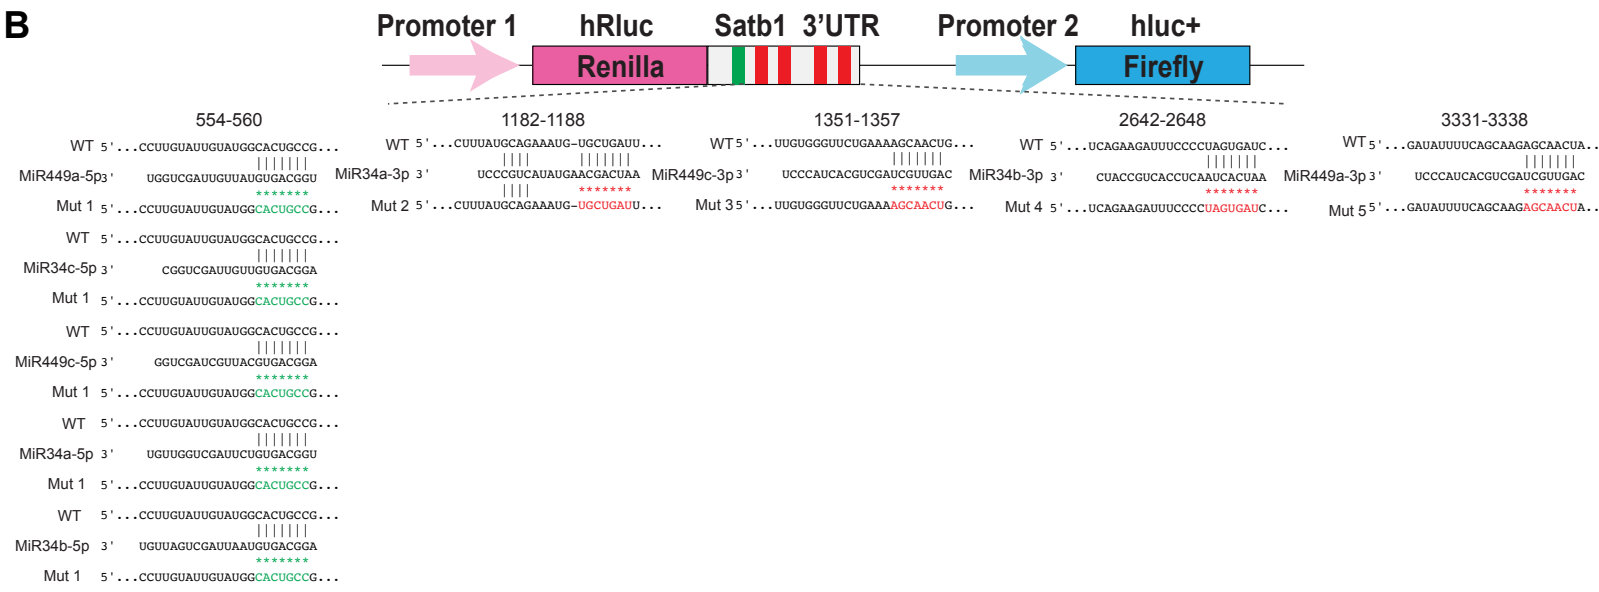

Supplement: supp [file elife_poa_e63768_Figure_5_figure_supplement_1.pdf › elife_poa_e63768_Figure_5_figure_supplement_1.pdf]

Figure 5—figure supplement 2

A

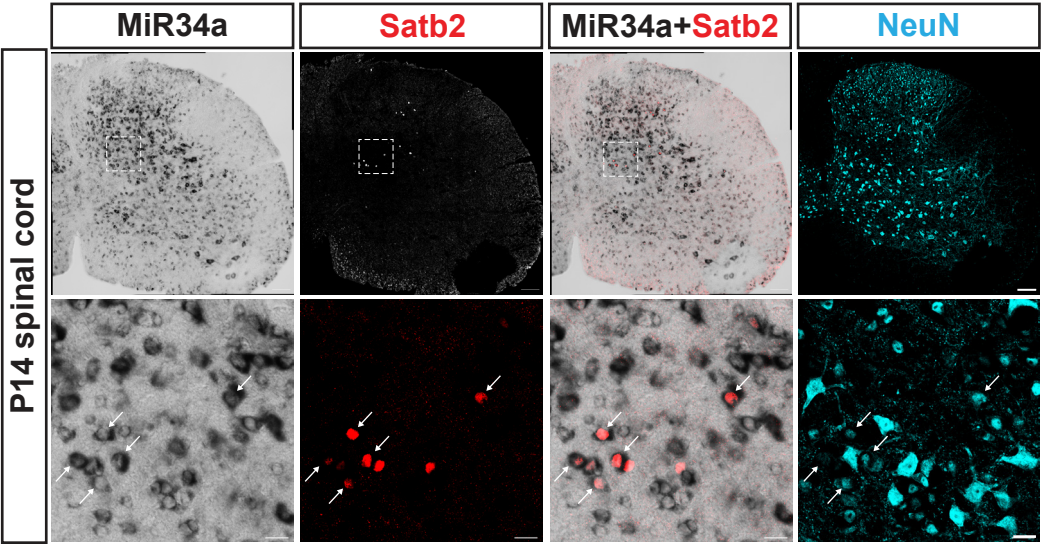

B

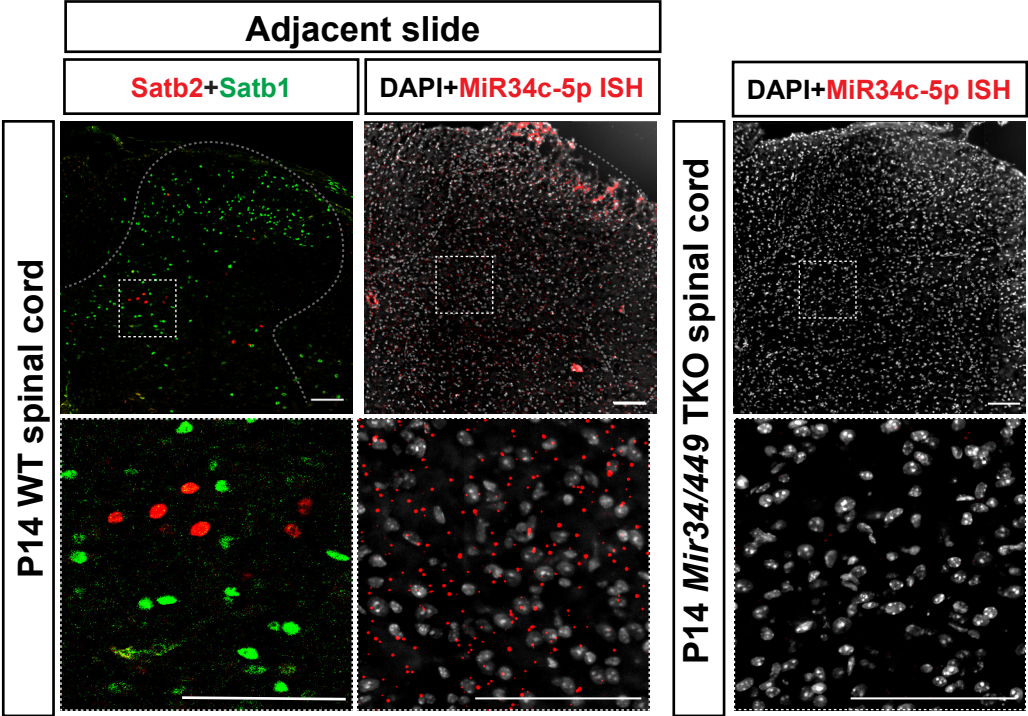

Supplement: supp [file elife_poa_e63768_Figure_5_figure_supplement_2.pdf › elife_poa_e63768_Figure_5_figure_supplement_2.pdf]

Figure 5—figure supplement 3

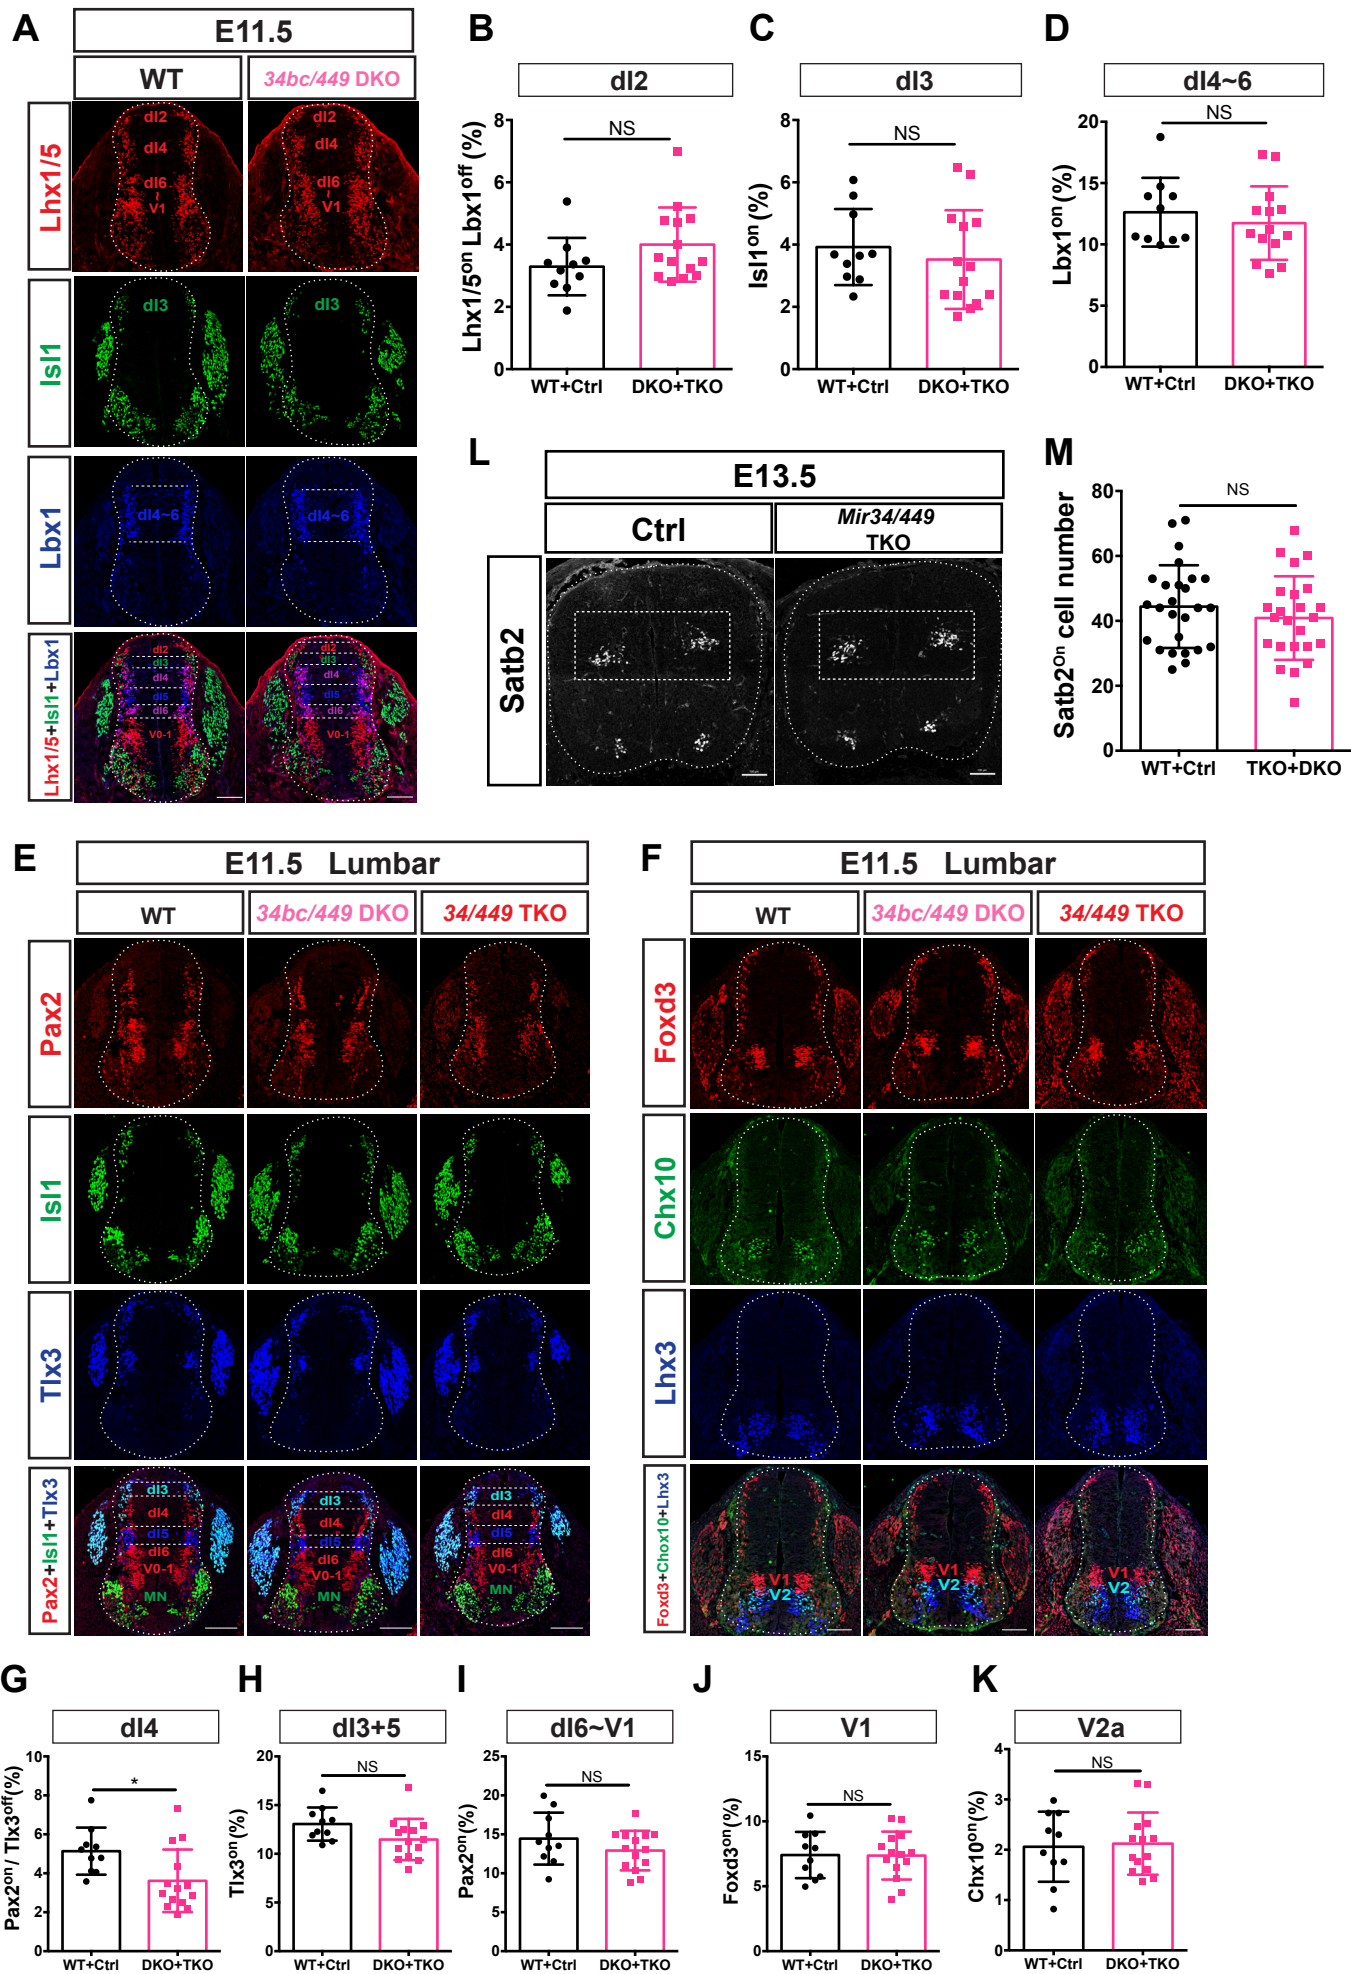

Supplement: supp [file elife_poa_e63768_Figure_5_figure_supplement_3.pdf › elife_poa_e63768_Figure_5_figure_supplement_3.pdf]

Figure 5—figure supplement 4

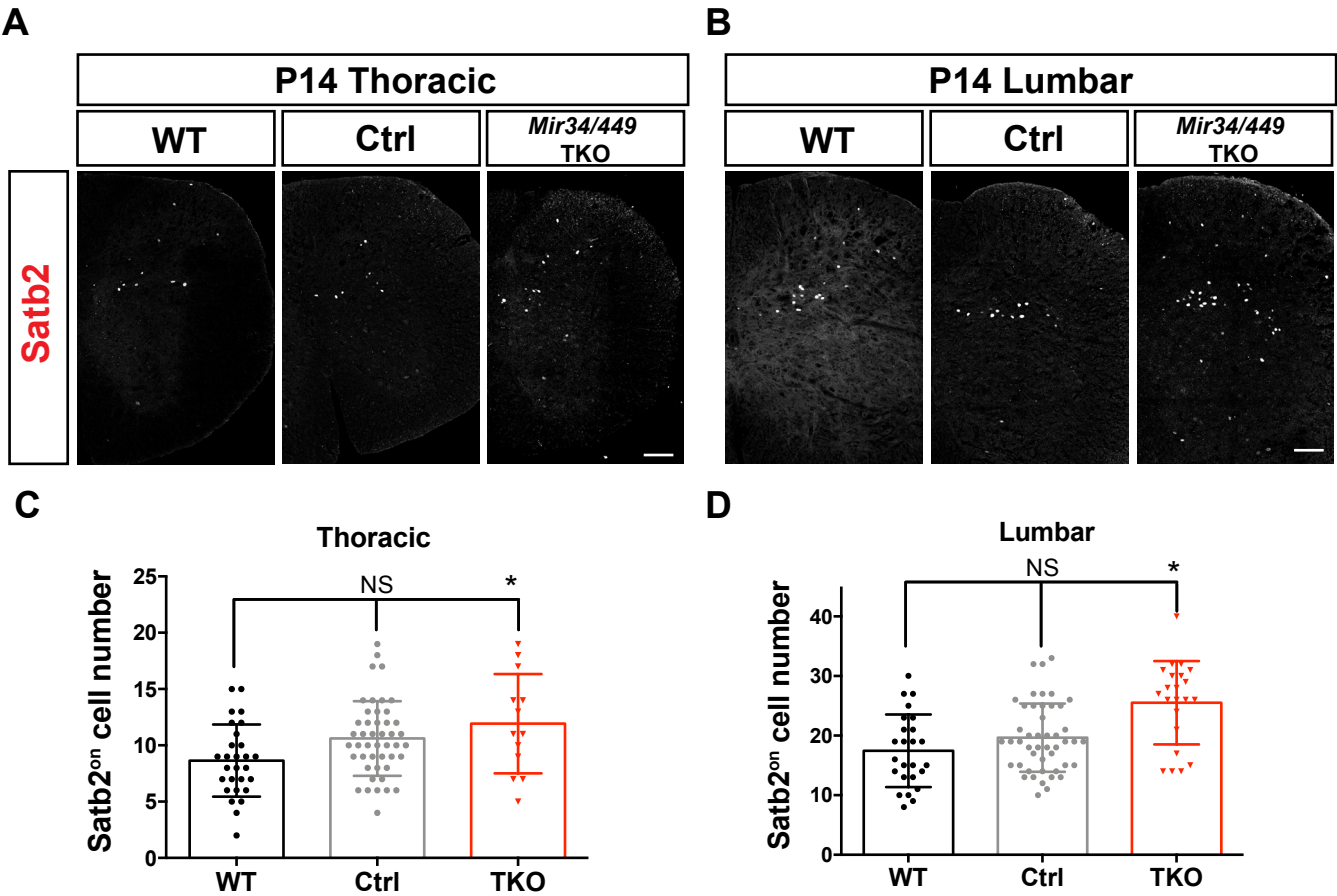

Supplement: supp [file elife_poa_e63768_Figure_5_figure_supplement_4.pdf › elife_poa_e63768_Figure_5_figure_supplement_4.pdf]

**Figure 5—figure supplement 5**

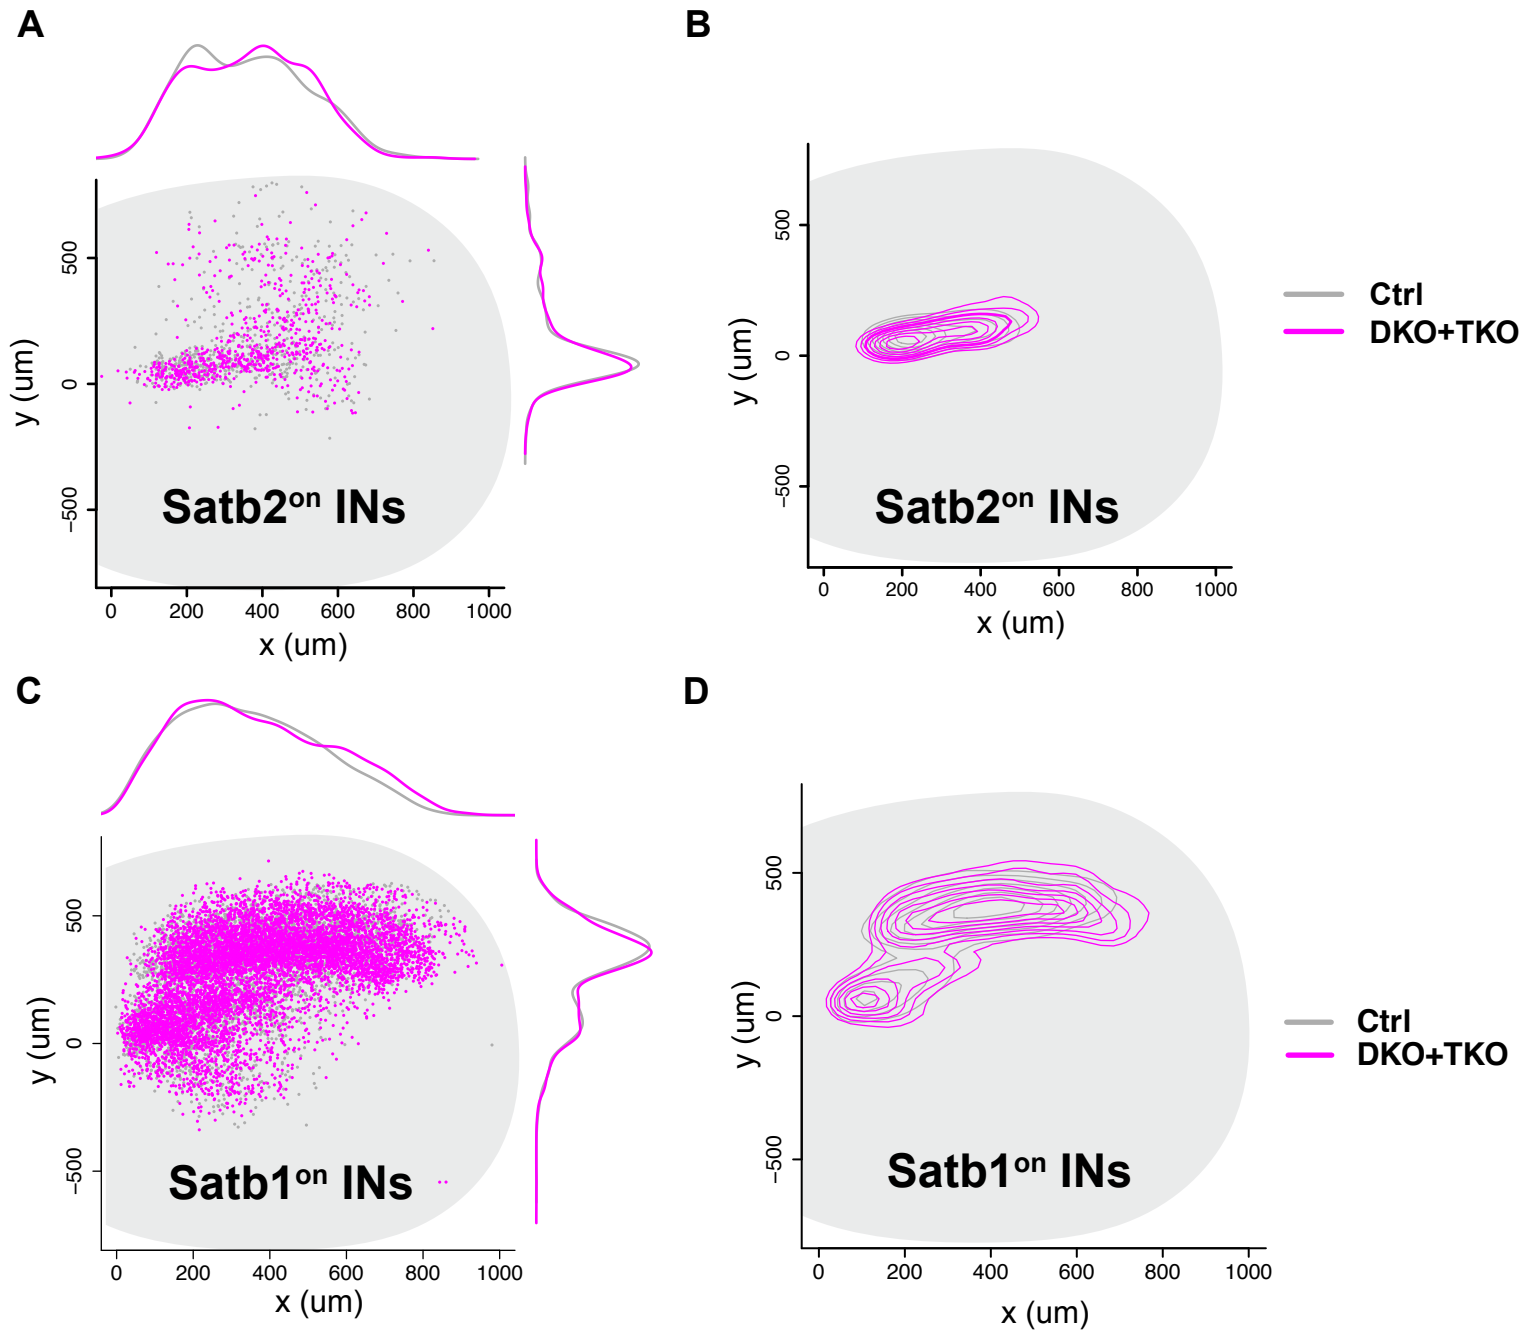

Supplement: supp [file elife_poa_e63768_Figure_5_figure_supplement_5.pdf › elife_poa_e63768_Figure_5_figure_supplement_5.pdf]
